# Supplementary material
Source: publisher figshare collection journal article supplement (https://tandf.figshare.com/ndownloader/files/17337791)
Supplement: Supplementary file 1 [file 17337791]

Supplementary Table 2. Effects of bentonite addition and *Z. mays* cultivation on residual PCBi concentrations (ng g-1) in the soil containing 400 ng ƩPCBi g-1 after 10 weeks of incubation.

| PCBi | without plant cultivation | | | with maize cultivation | | |
| --- | --- | --- | --- | --- | --- | --- |
| **B0* (Control)** | **B2** | **B4** | **B0** | **B2** | **B4** |
| CB5 | 4.48a | 4.46a | 4.50a | 2.53b | 2.23b | 0.90c |
| CB18 | 5.23a | 5.28a | 5.30a | 3.51b | 3.23c | 2.64d |
| CB31 | 11.5a | 11.8a | 11.7a | 6.78b | 5.66c | 2.62d |
| CB44 | 7.50a | 7.64a | 7.68a | 5.75b | 4.71c | 2.84d |
| CB52 | 2.84a | 2.52a | 2.72a | 1.78b | 1.58b | 1.08c |
| CB66 | 14.2a | 14.0a | 13.9a | 8.25b | 7.20c | 6.27d |
| CB87 | 43.8a | 43.7a | 43.6a | 31.5b | 27.5c | 18.7d |
| CB101 | 8.08a | 8.01a | 7.98a | 4.11b | 3.39b | 2.50c |
| CB110 | 21.7a | 22.4a | 21.0a | 12.7b | 9.40c | 7.04d |
| CB138 | 18.5a | 19.1a | 18.8a | 13.6b | 12.0c | 10.2d |
| CB141 | 73.3a | 74.5a | 74.4a | 30.1b | 32.3c | 31.0bc |
| CB151 | 15.5a | 15.5a | 15.8a | 6.77b | 5.44c | 4.37d |
| CB153 | 18.0a | 17.7a | 17.8a | 11.8b | 11.2b | 8.71c |
| CB170 | 20.5a | 20.4a | 21.0a | 10.3b | 9.37b | 7.71c |
| CB180 | 13.6a | 13.0a | 12.7a | 5.40b | 4.21c | 3.55d |
| CB183 | 51.8a | 51.7a | 52.7a | 24.5b | 23.3b | 21.0c |
| CB187 | 25.6a | 26.2a | 25.7a | 16.5b | 15.3b | 13.3c |

Different letters in each row represent signiﬁcant differences with Tukey test (P< 0.05).

*: B0: no bentonite addition, B2: 2% bentonite addition, B4: 4% bentonite addition
